# Supplementary material for: Does food-related cultural capital contribute to diet inequality in rural Australia? A pilot cross-sectional study
Source: bioRxiv or medRxiv preprint supplement (doi:10.1101/2020.10.22.20218040), 2020-10-27

## Supplementary information

**Supplementary Table 1. Survey questions.**

| <b>General demographics</b>                |                                                                                                                                                                                              |
|--------------------------------------------|----------------------------------------------------------------------------------------------------------------------------------------------------------------------------------------------|
| 1                                          | What is your age in years?                                                                                                                                                                   |
| 2                                          | What is the gender that you identify yourself with?                                                                                                                                          |
| 3                                          | What is your full residential address?                                                                                                                                                       |
| 4                                          | What is your highest educational qualification?                                                                                                                                              |
| 5                                          | What is your marital status?                                                                                                                                                                 |
| 6                                          | What is your employment status?                                                                                                                                                              |
| 7                                          | What is your total annual household income before tax or anything else is taken out?                                                                                                         |
| <b>Dietary outcomes</b>                    |                                                                                                                                                                                              |
| 8                                          | About how many pieces of fruit do you eat each day?                                                                                                                                          |
| 9                                          | About how many times a week do you eat vegetables with your main meal? Exclude hot chips.                                                                                                    |
| 10                                         | How many times a week do you eat meat, fish, seafood, nuts, beans, eggs or tofu with your meal?                                                                                              |
| 11                                         | What type of bread do you usually eat?                                                                                                                                                       |
| <b>Objectivised cultural capital</b>       |                                                                                                                                                                                              |
| 12a                                        | Could you please indicate whether you own the following cooking objects? – Oven                                                                                                              |
| 12b                                        | Could you please indicate whether you own the following cooking objects? – Cookery books                                                                                                     |
| 12c                                        | Could you please indicate whether you own the following cooking objects? – Set of knives                                                                                                     |
| 12d                                        | Could you please indicate whether you own the following cooking objects? – Kitchen scales                                                                                                    |
| 12e                                        | Could you please indicate whether you own the following cooking objects? – Fruit juicer                                                                                                      |
| <b>Total incorporated cultural capital</b> |                                                                                                                                                                                              |
| 13                                         | In the last month, how many times have you met with people in a public place to have some food?                                                                                              |
| 14                                         | In the last month, how many times have people visited your home to have dinner, or have you visited people for dinner in their home?                                                         |
| 15a                                        | Below you may find two statements about grocery shopping. Please indicate for both statements how often this applies to you. – Before I go shopping, I make a list of everything I need.     |
| 15b                                        | Below you may find two statements about grocery shopping. Please indicate for both statements how often this applies to you. – Usually I do not decide what to buy until I am in the shop.   |
| 16a                                        | Below you may find three statements about cooking. Please indicate for each of the following statements whether you agree or disagree. – I know several ways to prepare fish.                |
| 16b                                        | Below you may find three statements about cooking. Please indicate for each of the following statements whether you agree or disagree. – I can prepare a lot of meals even without a recipe. |
| 16c                                        | Below you may find three statements about cooking. Please indicate for each of the following statements whether you agree or disagree. – I know several ways to prepare vegetables.          |

|                                                               |                                                                                                                                                                                                                  |
|---------------------------------------------------------------|------------------------------------------------------------------------------------------------------------------------------------------------------------------------------------------------------------------|
| 17a                                                           | Below are questions about food information. Please indicate for each question how often this applies to you. – Do you read the nutrition information and information about ingredients on food packages?         |
| 17b                                                           | Below are questions about food information. Please indicate for each question how often this applies to you. – Do you use the information about nutritional value on food packages to decide what foods you buy? |
| 17c                                                           | Below are questions about food information. Please indicate for each question how often this applies to you. – Do you look up information about foodstuffs on the internet?                                      |
| 17d                                                           | Below are questions about food information. Please indicate for each question how often this applies to you. – Do you use recipes from cookery books, from the internet or from magazine?                        |
| 18a                                                           | Please indicate for the following four food items whether they are high or low in added sugar: - Bananas                                                                                                         |
| 18b                                                           | Please indicate for the following four food items whether they are high or low in added sugar: - Unflavoured yogurt                                                                                              |
| 18c                                                           | Please indicate for the following four food items whether they are high or low in added sugar: - Ice-cream                                                                                                       |
| 18d                                                           | Please indicate for the following four food items whether they are high or low in added sugar: - Tomato ketchup                                                                                                  |
| 19a                                                           | Please indicate for the following four food items whether they are high or low in protein: - Chicken                                                                                                             |
| 19b                                                           | Please indicate for the following four food items whether they are high or low in protein: - Cheese                                                                                                              |
| 19c                                                           | Please indicate for the following four food items whether they are high or low in protein: - Fruit                                                                                                               |
| 19d                                                           | Please indicate for the following four food items whether they are high or low in protein: - Broccoli                                                                                                            |
| 20a                                                           | Please indicate for the following four food items whether they are high or low in fibre: - Eggs                                                                                                                  |
| 20b                                                           | Please indicate for the following four food items whether they are high or low in fibre: - Nuts                                                                                                                  |
| 20c                                                           | Please indicate for the following four food items whether they are high or low in fibre: - Chicken                                                                                                               |
| 20d                                                           | Please indicate for the following four food items whether they are high or low in fibre: - Broccoli                                                                                                              |
| 21a                                                           | Please indicate for the following four food items whether they are high or low in saturated fat: - Olive oil                                                                                                     |
| 21b                                                           | Please indicate for the following four food items whether they are high or low in saturated fat: - Nuts                                                                                                          |
| 21c                                                           | Please indicate for the following four food items whether they are high or low in saturated fat: - Red meat                                                                                                      |
| 21d                                                           | Please indicate for the following four food items whether they are high or low in saturated fat: - Chocolate                                                                                                     |
| <b>Other confounders - Vegetarian</b>                         |                                                                                                                                                                                                                  |
| 22                                                            | Are you vegetarian? Please tick 'No' if you are pescatarian (eat fish or shellfish)                                                                                                                              |
| <b>Other confounders – Barriers to access of healthy food</b> |                                                                                                                                                                                                                  |
| 23                                                            | How much time does it usually take to get to the grocery store for the major food shopping?                                                                                                                      |
| 24                                                            | During the past 30 days, how much money did you spend at supermarkets or grocery stores? Please answer in Australian dollars.                                                                                    |

|                                                                        |                                                                                                                                                                                                                                                                                |
|------------------------------------------------------------------------|--------------------------------------------------------------------------------------------------------------------------------------------------------------------------------------------------------------------------------------------------------------------------------|
| 25a                                                                    | How often do the following situations make it difficult for you/your household to get healthy foods? (healthy food includes fruits and vegetables, whole grains, beans and legumes, low-fat dairy, and lean meats)? – Distance to your usual grocery store                     |
| 25b                                                                    | How often do the following situations make it difficult for you/your household to get healthy foods? (healthy food includes fruits and vegetables, whole grains, beans and legumes, low-fat dairy, and lean meats)? – Lack of transportation                                   |
| 25c                                                                    | How often do the following situations make it difficult for you/your household to get healthy foods? (healthy food includes fruits and vegetables, whole grains, beans and legumes, low-fat dairy, and lean meats)? – Hours your usual grocery store is open                   |
| 25d                                                                    | How often do the following situations make it difficult for you/your household to get healthy foods? (healthy food includes fruits and vegetables, whole grains, beans and legumes, low-fat dairy, and lean meats)? – Price                                                    |
| 25e                                                                    | How often do the following situations make it difficult for you/your household to get healthy foods? (healthy food includes fruits and vegetables, whole grains, beans and legumes, low-fat dairy, and lean meats)? – Physical disabilities                                    |
| 25f                                                                    | How often do the following situations make it difficult for you/your household to get healthy foods? (healthy food includes fruits and vegetables, whole grains, beans and legumes, low-fat dairy, and lean meats)? – Time available to go shopping                            |
| 25g                                                                    | How often do the following situations make it difficult for you/your household to get healthy foods? (healthy food includes fruits and vegetables, whole grains, beans and legumes, low-fat dairy, and lean meats)? – Selection of items available at your usual grocery store |
| 25h                                                                    | How often do the following situations make it difficult for you/your household to get healthy foods? (healthy food includes fruits and vegetables, whole grains, beans and legumes, low-fat dairy, and lean meats)? – Quality of items available at your usual grocery store   |
| <b>Other confounders –Frequency of eating out or eating take-aways</b> |                                                                                                                                                                                                                                                                                |
| 26                                                                     | How many times do you eat out/eat take-away food each week?                                                                                                                                                                                                                    |

**Supplementary Figure 1. Distribution and cut-offs for diet score.**

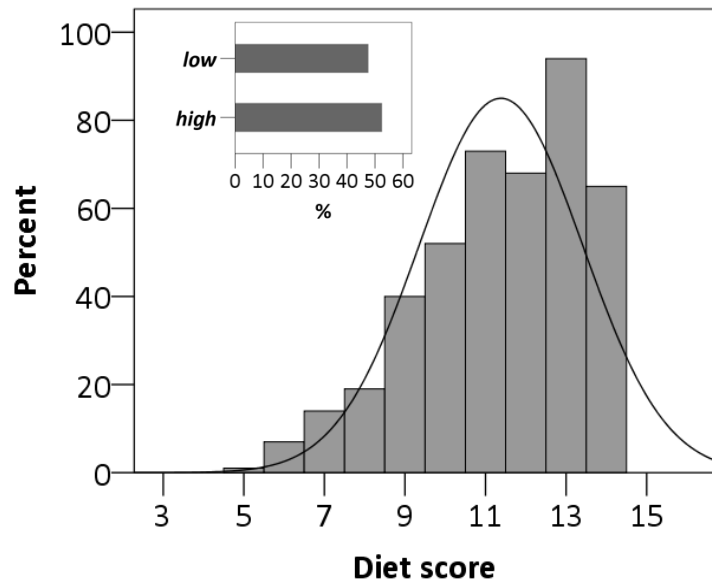

Supplement: Supplementary file [file media-1.pdf]
